# Supplementary material for: Kidney function, brain morphology and cognition in the elderly: sex differences in the Austrian Stroke Prevention Study
Source: publisher site journal article supplement (doi:10.18632/aging.203829), 2022-01-13
Supplement: Supplementary file [file aging-v14i1-203829-supplementary-material-SD1.pdf]

## SUPPLEMENTARY TABLE

**Supplementary Table 1. Mediation analysis assessing the effect of structural and microstructural MRI changes on the relationship between eGFR and executive function in men (N=129).**

| <b>Mediator</b> | <b>Indirect effect*</b> | <b>SE</b> | <b>Lower CI</b> | <b>Upper CI</b> |
|-----------------|-------------------------|-----------|-----------------|-----------------|
| Neocortex       | 0.0020                  | 0.0018    | -0.0011         | 0.0061          |
| Frontal Lobe    | 0.0013                  | 0.0014    | -0.0012         | 0.0046          |
| Parietal Lobe   | 0.0016                  | 0.0015    | -0.0006         | 0.0051          |
| Temporal Lobe   | 0.0007                  | 0.0010    | -0.0008         | 0.0034          |
| Occipital Lobe  | 0.0010                  | 0.0013    | -0.0010         | 0.0040          |

Mediation analysis adjusted for age, education, smoking status, alcohol, hypertension, diabetes, hypercholesterolemia, HDL, diastolic BP, Homocystein, Haemoglobin and Transferrin saturation.

\*Indirect effect of eGFR on executive function. SE, standard error of the indirect effect; CI, bootstrapped confidence interval of the indirect effect; eGFR, estimated glomerular filtration rate.
